# Supplementary material
Source: publisher site journal article supplement (https://www.dovepress.com/article/104238)
Supplement: Supplementary file 1 [file get_supplementary_file.php]

## Search strategy for MEDLINE

*MEDLINE (Ovid) 1946 to August Week 4 2014*

- 1 chronic obstructive pulmonary disease.mp. or exp Pulmonary Disease, Chronic Obstructive/
- 2 copd.mp.
- 3 chronic obstructive lung disease.mp.
- 4 chronic obstructive airway disease.mp.
- 5 chronic respiratory disorder\$.mp.
- 6 smoking-related lung disease\$.mp.
- 7 Pulmonary Emphysema/
- 8 exp Bronchitis/
- 9 emphysema.mp.
- 10 or/1-9
- 11 exp positive-pressure respiration/ or intermittent positive-pressure ventilation/
- 12 cpap.mp.
- 13 bipap.mp.
- 14 bi-level ventilation.mp.
- 15 niv.mp.
- 16 nippv.mp.
- 17 positive pressure ventilation.mp.
- 18 positive airway pressure.mp.
- 19 ((noninvasive or non-invasive) adj2 ventilation).mp.
- 20 nppv.mp.
- 21 or/11-20
- 22 10 and 21
- 23 limit 22 to yr="1980 - 2014"

## Exacerbation results

| Study                           | Design     | Length of follow-up | Outcome                                                 | Results                                                                          | Direction of effect                                                                       | Indication of severity                                                                                                                                                                                                                                      |
|---------------------------------|------------|---------------------|---------------------------------------------------------|----------------------------------------------------------------------------------|-------------------------------------------------------------------------------------------|-------------------------------------------------------------------------------------------------------------------------------------------------------------------------------------------------------------------------------------------------------------|
| <i>Stable population</i>        |            |                     |                                                         |                                                                                  |                                                                                           |                                                                                                                                                                                                                                                             |
| Bhatt 2013 <sup>1</sup>         | RCT        | 6 months            | Number of exacerbations                                 | NIV: 1/15, usual care 1/12 or 1/15 (unclear)                                     | No difference. Not pre-defined outcome.                                                   | No details.                                                                                                                                                                                                                                                 |
| Casanova 2000 <sup>2</sup>      | RCT        | 3 and 12 months     | Percentage patients affected by exacerbation            | 3 months: NIV: 52 %, usual care: 56%<br><br>12 months: NIV: 66%, usual care: 69% | Slight trend favoring NIV, but no significant differences<br><br>Unclear if ITT analysis. | No details.                                                                                                                                                                                                                                                 |
| Duiverman 2011 <sup>3</sup>     | RCT        | 24 months           | Number of exacerbations                                 | Median of 3 exacerbations per year for both NIV and usual care                   | No significant difference. No other outcome statistics reported.                          | No details.                                                                                                                                                                                                                                                 |
| Zhou 2008 <sup>4</sup>          | RCT        | 12 months           | Exacerbations/patient/year                              | NIV: 3.73(1.03)<br>Usual care: 4.86(1.71)                                        | Significant difference favoring NIV                                                       | No details on severity. Some may have led to hospitalizations, as these are also reported.                                                                                                                                                                  |
| Tsolaki 2008 <sup>5</sup>       | Controlled | 12 months           | Exacerbations/patient/year                              | NIV: 1.4 (2.1)<br>Usual care: 1.8 (1.4)                                          | No significant difference.                                                                | All exacerbations, including those leading to hospitalizations.                                                                                                                                                                                             |
|                                 |            |                     | Exacerbations/patient/year leading to hospitalization   | NIV: 1.0 (2.2)<br>Usual care: 1.7 (1.3)                                          | No significant difference.                                                                | Exacerbations assumed to be severe, as resulted in hospitalizations.                                                                                                                                                                                        |
| <i>Post-hospital population</i> |            |                     |                                                         |                                                                                  |                                                                                           |                                                                                                                                                                                                                                                             |
| Cheung 2010 <sup>6</sup>        | RCT        | 12 months           | Exacerbation without AHFR                               | NIV: 5/23, usual care: 4/24                                                      | No details on statistical significance                                                    | Outcome listed as adverse event (not predefined outcome).                                                                                                                                                                                                   |
|                                 |            |                     | Recurrent severe COPD exacerbation with AHFR            | NIV: 7/23, usual care: 14/24<br>HR 0.39 (0.16, 0.98)                             | Statistically significant difference favoring NIV.                                        | Severe (assumed to result in hospitalization and included in hospitalization outcome)                                                                                                                                                                       |
| Struik 2014 <sup>7</sup>        | RCT        | 12 months           | Annual number of exacerbations at home (median (range)) | NIV: 1 (0-9)<br>Usual care: 2 (0-14)                                             | No statistically significant difference (p=0.26).                                         | Exacerbation defined as an event in the natural course of the disease characterised by a change in the patient's baseline dyspnoea, cough, and/or sputum beyond day-to-day variations, is acute in onset, and treated with antibiotics and/or prednisolone. |

### Quality-of-Life results

| Study                                               | Design                   | Length of follow-up                                           | Time-points for assessment  | Results                                                                                                                                                                                                                                   | Direction of effect                                                                                                                                                                            |
|-----------------------------------------------------|--------------------------|---------------------------------------------------------------|-----------------------------|-------------------------------------------------------------------------------------------------------------------------------------------------------------------------------------------------------------------------------------------|------------------------------------------------------------------------------------------------------------------------------------------------------------------------------------------------|
| <i>Stable populations</i>                           |                          |                                                               |                             |                                                                                                                                                                                                                                           |                                                                                                                                                                                                |
| <i>SF-36</i>                                        |                          |                                                               |                             |                                                                                                                                                                                                                                           |                                                                                                                                                                                                |
| Köhnlein 2014 <sup>8</sup>                          | RCT                      | 3, 6, 9 and 12 months                                         | 12 months                   | General health perception sub-score only: 8.6 (1.8 to 13.3) point greater improvement in NIV group                                                                                                                                        | No significant difference for summary score (data not reported). Significant difference favoring NIV for general health perception sub-score (p=0.013). Results based on small sub-group only. |
| McEvoy 2009 <sup>9</sup>                            | RCT                      | Median 28.5 (NIV) and 20.5 (usual care) months; up to 5 years | 12 months                   | Results presented separately for the 8 sub-scales of SF-36. No summary scores.                                                                                                                                                            | Statistically significant difference for 2/8 sub-scales (general health and mental health) favoring usual care group. No significant differences for other sub-scales.                         |
| Tsolaki 2008 <sup>5</sup>                           | Prospective controlled   | 12 months                                                     | 1, 3, 6, 9 and 12 months    | Results for mental and physical summary scores                                                                                                                                                                                            | Statistically significant difference favoring NIV for mental and physical scores at 6, 9 and 12 months                                                                                         |
| <i>SGRQ</i>                                         |                          |                                                               |                             |                                                                                                                                                                                                                                           |                                                                                                                                                                                                |
| Clini 2002 <sup>10</sup>                            | RCT                      | 24 months                                                     | 24 months                   | Score changes:<br>-5% in NIV group,<br>-4% in usual care group (increase in QoL in both arms)                                                                                                                                             | No significant difference                                                                                                                                                                      |
| Köhnlein 2014 <sup>8</sup>                          | RCT                      | 3, 6, 9 and 12 months                                         | 12 months                   | 6.2 (0.7 to 11.8) point greater improvement in NIV group.                                                                                                                                                                                 | Statistically significant difference favoring NIV (p=0.029), but results based on small sub-group only.                                                                                        |
| McEvoy 2009 <sup>9</sup>                            | RCT                      | Median 28.5 (NIV) and 20.5 (usual care) months; up to 5 years | 12 months                   | No data reported                                                                                                                                                                                                                          | No significant difference                                                                                                                                                                      |
| Clini 2002 <sup>10</sup> & McEvoy 2009 <sup>9</sup> | IPD data from both RCTs* | See above                                                     | 12 months                   | Mean difference of 0.9 (95% CI -19.21 to 21.01)                                                                                                                                                                                           | No significant difference (small benefit favoring usual care arm)                                                                                                                              |
| Meecham-Jones 1995 <sup>11</sup>                    | RCT                      | 3 months                                                      | 3 months                    | Only individual results; no summary data                                                                                                                                                                                                  | Significant difference for symptom, activity and total score favoring NIV; no significant difference for activity scale                                                                        |
| <i>SRI</i>                                          |                          |                                                               |                             |                                                                                                                                                                                                                                           |                                                                                                                                                                                                |
| Duiverman 2008 <sup>12</sup>                        | RCT                      | 3 months                                                      | 3 months                    | NIV: 60.1 (11), usual care 55.7 (15). Between group difference adjusted for baseline: 3.1 (-2, 8.2)                                                                                                                                       | Trend for better QoL in NIV group; not statistically significant                                                                                                                               |
| Duiverman 2011 <sup>3</sup>                         | RCT                      | 24 months                                                     | 6, 12, 18, 24 months        | 6 months:<br>NIV: 59.5 (14.4); usual care: 55.6 (9.5.2)<br>12 months:<br>NIV: 60.5 (10.9); usual care: 55.8 (13.4)<br>18 months:<br>NIV: 56.8 (12.7); usual care: 54.4 (11.8)<br>24 months: adjusted difference in change 2.9 (-1.9, 7.8) | Trend for better QoL in NIV group at all time-points; not statistically significant                                                                                                            |
| Köhnlein 2014 <sup>8</sup>                          | RCT                      | 3, 6, 9 and 12 months                                         | 12 months                   | 5.6 (0.1 to 11.1) point greater improvement in NIV group.                                                                                                                                                                                 | Statistically significant difference favoring NIV (p=0.0445), but based on small sub-group only.                                                                                               |
| <i>CRDQ</i>                                         |                          |                                                               |                             |                                                                                                                                                                                                                                           |                                                                                                                                                                                                |
| Bhatt 2013 <sup>1</sup>                             | RCT                      | 6 months                                                      | 6 weeks, 3 months, 6 months | No total score given, only for sub-scales at 6 weeks, 3 months and 6 months.                                                                                                                                                              | Significant difference at 6 months for mastery sub-score favoring NIV, but no significant difference for other 3 sub-scales. No significant improvement in total score.                        |
| Duiverman 2008 <sup>12</sup>                        | RCT                      | 3 months                                                      | 3 months                    | NIV: 96.8 (15), usual care 87.9 (20). Between group difference adjusted for baseline: 7.5 (-1, 16)                                                                                                                                        | Trend for better QoL in NIV group but not statistically significant                                                                                                                            |

| Study                           | Design | Length of follow-up                                           | Time-points for assessment | Results                                                                                                                                                                                                                                    | Direction of effect                                                                                                                           |
|---------------------------------|--------|---------------------------------------------------------------|----------------------------|--------------------------------------------------------------------------------------------------------------------------------------------------------------------------------------------------------------------------------------------|-----------------------------------------------------------------------------------------------------------------------------------------------|
| Duiverman 2011 <sup>3</sup>     | RCT    | 24 months                                                     | 6, 12, 18 and 24 months    | 6 months:<br>NIV: 94.4 (20.3); usual care: 86.3 (18.4)<br>12 months:<br>NIV: 93.5 (16.5); usual care: 87.7 (19.14)<br>18 months:<br>NIV: 89.9 (17.3); usual care: 88.7 (21.5)<br>24 months: adjusted difference in change -1.3 (-9.7, 7.4) | Trend for better QoL in NIV group at all time-points; not statistically significant                                                           |
| Garrod 2000 <sup>13</sup>       | RCT    | 3 months                                                      | 1,2 and 3 months           | 1 and 2 month data in graph only.<br>3 months:<br>NIV: 92.2 (17); usual care: 85.1 (23.9). mean difference in change 12.3 (1.19, 23.4) , p=0.03                                                                                            | Statistically significant difference favoring NIV (3 months)                                                                                  |
| <i>MRF</i>                      |        |                                                               |                            |                                                                                                                                                                                                                                            |                                                                                                                                               |
| Clini 2002 <sup>10</sup>        | RCT    | 24 months                                                     | 24 months                  | Mean difference (adjusted for baseline) 7.1 (0.13-4.07), p=0.041                                                                                                                                                                           | Statistically significant difference favoring NIV (24 months)                                                                                 |
| Duiverman 2008 <sup>12</sup>    | RCT    | 3 months                                                      | 3 months                   | Mean difference (adjusted for baseline) -9.7 (-18 to -1), p<0.05                                                                                                                                                                           | Statistically significant difference favoring NIV (3 months)                                                                                  |
| Duiverman 2011 <sup>3</sup>     | RCT    | 24 months                                                     | 6, 12, 18 and 24 months    | Mean difference (adjusted for baseline) 12 months: -13.4 (-22.7, -4.2) , p<0.05                                                                                                                                                            | Statistically significant difference favoring NIV (24 months)                                                                                 |
| <i>POMS</i>                     |        |                                                               |                            |                                                                                                                                                                                                                                            |                                                                                                                                               |
| McEvoy 2009 <sup>9</sup>        | RCT    | Median 28.5 (NIV) and 20.5 (usual care) months; up to 5 years | 12 months                  | NIV Total mood score median 22 (IQR 48), usual care 5 (IQR 21); p=0.318                                                                                                                                                                    | No statistically significant difference for total score; statistically significant difference favoring usual care for two sub-groups on POMS. |
| <i>Post-hospital population</i> |        |                                                               |                            |                                                                                                                                                                                                                                            |                                                                                                                                               |
| <i>CCQ</i>                      |        |                                                               |                            |                                                                                                                                                                                                                                            |                                                                                                                                               |
| Struik 2014 <sup>7</sup>        | RCT    | 12 months                                                     | 12 months                  | Mean difference in change -0.04 (-0.5 to 0.4)                                                                                                                                                                                              | Not statistically significant between groups (completers only).                                                                               |
| <i>MRF</i>                      |        |                                                               |                            |                                                                                                                                                                                                                                            |                                                                                                                                               |
| Struik 2014 <sup>7</sup>        | RCT    | 12 months                                                     | 12 months                  | Mean difference in change -1.5 (-8.6 to 5.7)                                                                                                                                                                                               | Not statistically significant between groups (completers only).                                                                               |
| <i>CRDQ</i>                     |        |                                                               |                            |                                                                                                                                                                                                                                            |                                                                                                                                               |
| Struik 2014 <sup>7</sup>        | RCT    | 12 months                                                     | 12 months                  | Mean difference in change 0.01 (-0.4 to 0.4)                                                                                                                                                                                               | Not statistically significant between groups (completers only).                                                                               |
| <i>SRI</i>                      |        |                                                               |                            |                                                                                                                                                                                                                                            |                                                                                                                                               |
| Struik 2014 <sup>7</sup>        | RCT    | 12 months                                                     | 12 months                  | Mean difference in change 4.8 (-0.1 to 9.7)                                                                                                                                                                                                | Not statistically significant between groups (completers only).                                                                               |

\*From Struik (2013)<sup>14</sup>

## Results of RCTs comparing different types of NIV

### Adherence to NIV and adverse events associated with NIV (NIV versus NIV)

| Study                      | Modes being compared | Period of adaptation/help in adapting to NIV                                                    | Recommended period of use | Adherence-how measured     | Adherence –mean hours use                                                   | Adherence -% of patients or other                                                                                                                  | Adverse events associated with NIV                                    |
|----------------------------|----------------------|-------------------------------------------------------------------------------------------------|---------------------------|----------------------------|-----------------------------------------------------------------------------|----------------------------------------------------------------------------------------------------------------------------------------------------|-----------------------------------------------------------------------|
| Dreher 2010 <sup>15</sup>  | High intensity       | Number of days needed for initiation of NIV: 4.6 (1.0) high, period 2, 3.7 (1.0) high, period 2 | 'Nocturnal use'           | Ventilator counter reading | Mean h/day period 1:10.8 (4.7), period 2: 8.9 (6.4)                         | 2 drop-outs from low intensity treatment arm (first period). Two patients refused to swap to low intensity after first period with high intensity. | One patient refused low intensity NIV in hospital due to intolerance. |
|                            | Low intensity        | Number of days needed for initiation of NIV: 1.7 (1.6) low, period 1, 1.6 (0.8) low, period 2   |                           |                            | Mean h/day period 1: 7.7 (3.0), period 2: 4.6 (1.8)                         |                                                                                                                                                    |                                                                       |
| Murphy 2012 <sup>16</sup>  | High-intensity       | No details                                                                                      | 'Nocturnal use'           | Ventilator download data   | Mean nightly use (h:m) 6:33 (2:14)                                          | 1/12 withdrawal (acute exacerbation)                                                                                                               | Appear to be none                                                     |
|                            | High-pressure        |                                                                                                 |                           |                            | Mean nightly use (h:m): 6:37 (1:45)<br>Mean difference 0:04 (-0:45 to 0:53) | 4/12 withdrawals (1 claustrophobia, 2 intolerant of therapy, 1 prolonged central sleep apnoeas)                                                    | 1 claustrophobia, 2 intolerant of therapy                             |
| Oscroft 2010 <sup>17</sup> | Volume assured (va)  | Patients already established on pp-NIV, mean use at study entry 7.8 (2.2) hours /day            | 'Nocturnal use'           | Ventilator download data   | 8.2 (3.6) hours/day                                                         | 1/25 withdrew due to exacerbation                                                                                                                  | Appear to be none                                                     |
|                            | Pressure preset (pp) |                                                                                                 |                           |                            | 7.7 (2.4) hours/day                                                         |                                                                                                                                                    |                                                                       |

## Lung function, blood gases and 6MWD

| <b>FEV<sub>1</sub> (l or % predicted)</b> |                                                                                                            |                                                                                                                                                                 |
|-------------------------------------------|------------------------------------------------------------------------------------------------------------|-----------------------------------------------------------------------------------------------------------------------------------------------------------------|
| <i>Study</i>                              | <i>Comparison</i>                                                                                          | <i>Main findings</i>                                                                                                                                            |
| Dreher 2010 <sup>15</sup>                 | High intensity (pressure) versus low intensity (pressure)                                                  | Significant increase from baseline to 6 weeks in high intensity group. No significant between group differences at 6 weeks for FEV <sub>1</sub> (l).            |
| Oscroft 2010 <sup>17</sup>                | Volume assured (higher pressure) versus pressure pre-set (lower pressure)                                  | Slightly higher values with volume assured NIV. No significant between group differences at 6 weeks for FEV <sub>1</sub> (l) or FEV <sub>1</sub> (% predicted). |
| <b>FVC (l or % predicted)</b>             |                                                                                                            |                                                                                                                                                                 |
| Oscroft 2010 <sup>17</sup>                | Volume assured (higher pressure) versus pressure pre-set (lower pressure)                                  | No significant between group differences at 8 weeks for FVC (l) or FVC (% predicted).                                                                           |
| <b>PaCO<sub>2</sub></b>                   |                                                                                                            |                                                                                                                                                                 |
| Dreher 2010 <sup>15</sup>                 | High intensity (pressure) versus low intensity (pressure)                                                  | Statistically significant difference in reduction favoring high-intensity NIV (p=0.001).                                                                        |
| Oscroft 2010 <sup>17</sup>                | Volume assured (higher pressure) versus pressure pre-set (lower pressure)                                  | No significant between group differences (8 weeks).                                                                                                             |
| Murphy 2012 <sup>16</sup>                 | High intensity (high pressure + high back-up rate) versus high-pressure (high pressure + low back-up rate) | No significant between group differences (6 weeks).                                                                                                             |
| <b>6MWD</b>                               |                                                                                                            |                                                                                                                                                                 |
| Dreher 2010 <sup>15</sup>                 | High intensity (pressure) versus low intensity (pressure)                                                  | No significant between group differences (6 weeks).                                                                                                             |

## Quality-of-Life

The studies by Dreher (2010)<sup>15</sup> and Oscroft (2010)<sup>17</sup> comparing different pressures found no differences in total SRI score<sup>15</sup> or SF-36 and SGRQ scores<sup>17</sup> respectively, though there was a trend for better quality-of-life on the SGRQ with volume assured NIV. The first<sup>15</sup> of these two studies was rated as having a high risk of bias regarding incomplete outcome data. Neither of these studies was designed to look at quality-of-life as a primary outcome.

Murphy (2012)<sup>16</sup>, which compared different breathing frequencies, also found no significant differences in total SRI scores, though there was a statistically significant difference for the respiratory symptom domain favoring high pressure ventilation (pressure support ventilation).

- (1) Bhatt SP, Peterson MW, Wilson JS, Durairaj L. Noninvasive positive pressure ventilation in subjects with stable COPD: a randomized trial. *Int J Chron Obstruct Pulmon Dis* 2013; 8:581-589.
- (2) Casanova C, Celli BR, Tost L, Soriano E, Abreu J, Velasco V et al. Long-term controlled trial of nocturnal nasal positive pressure ventilation in patients with severe COPD. *Chest* 2000; 118(6):1582-1590.
- (3) Duiverman ML, Wempe JB, Bladder G, Vonk JM, Zijlstra JG, Kerstjens HA et al. Two-year home-based nocturnal noninvasive ventilation added to rehabilitation in chronic obstructive pulmonary disease patients: a randomized controlled trial. *Respiratory Research* 2011; 12:112.
- (4) Zhou X. Effect of Non-Invasive Positive Pressure Ventilation and Long-term Oxygen Therapy in Patients with Stable COPD. *Clinical Medical Journal of China* 2008; 15(4):486-488.
- (5) Tsolaki V, Pastaka C, Karetsi E, Zygoulis P, Koutsokera A, Gourgoulisanis KI et al. One-year non-invasive ventilation in chronic hypercapnic COPD: effect on quality of life. *Respiratory Medicine* 2008; 102(6):904-911.
- (6) Cheung AP, Chan VL, Liong JT, Lam JY, Leung WS, Lin A et al. A pilot trial of non-invasive home ventilation after acidotic respiratory failure in chronic obstructive pulmonary disease. *International Journal of Tuberculosis & Lung Disease* 2010; 14(5):642-649.
- (7) Struik FM, Sprooten RT, Kerstjens HA, Bladder G, Zijnen M, Asin J et al. Nocturnal non-invasive ventilation in COPD patients with prolonged hypercapnia after ventilatory support for acute respiratory failure: a randomised, controlled, parallel-group study. *Thorax* 2014; 69(9):826-834.
- (8) Kohnlein T, Windisch W, Kohler D, Drabik A, Geiseler J, Hartl S et al. Non-invasive positive pressure ventilation for the treatment of severe stable chronic obstructive pulmonary disease: a prospective, multicentre, randomised, controlled clinical trial. *Lancet Respir Med* 2014; 2(9):698-705.
- (9) McEvoy RD, Pierce RJ, Hillman D, Esterman A, Ellis EE, Catcheside PG et al. Nocturnal non-invasive nasal ventilation in stable hypercapnic COPD: a randomised controlled trial. *Thorax* 2009; 64(7):561-566.
- (10) Clini E, Sturani C, Rossi A, Viaggi S, Corrado A, Donner CF et al. The Italian multicentre study on noninvasive ventilation in chronic obstructive pulmonary disease patients. [Erratum appears in *Eur Respir J*. 2002 Dec;20(6):1617]. *European Respiratory Journal* 2002; 20(3):529-538.
- (11) Meecham-Jones DJ, Paul EA, Jones PW, Wedzicha JA. Nasal pressure support ventilation plus oxygen compared with oxygen therapy alone in hypercapnic COPD. *Am J Respir Crit Care Med* 1995; 152(2):538-544.
- (12) Duiverman ML, Wempe JB, Bladder G, Jansen DF, Kerstjens HA, Zijlstra JG et al. Nocturnal non-invasive ventilation in addition to rehabilitation in hypercapnic patients with COPD. *Thorax* 2008; 63(12):1052-1057.

- (13) Garrod R, Mikelsons C, Paul EA, Wedzicha JA. Randomized controlled trial of domiciliary noninvasive positive pressure ventilation and physical training in severe chronic obstructive pulmonary disease. *American Journal of Respiratory & Critical Care Medicine* 2000; 162(4 Pt 1):1335-1341.
- (14) Struik FM, Lacasse Y, Goldstein R, Kerstjens HM, Wijkstra PJ. Nocturnal non-invasive positive pressure ventilation for stable chronic obstructive pulmonary disease. *The Cochrane database of systematic reviews* 2013; 6(pp CD002878).
- (15) Dreher M, Storre JH, Schmoor C, Windisch W. High-intensity versus low-intensity non-invasive ventilation in patients with stable hypercapnic COPD: a randomised crossover trial. *Thorax* 2010; 65(4):303-308.
- (16) Murphy PB, Brignall K, Moxham J, Polkey MI, Davidson AC, Hart N. High pressure versus high intensity noninvasive ventilation in stable hypercapnic chronic obstructive pulmonary disease: a randomized crossover trial. *Int J Chron Obstruct Pulmon Dis* 2012; 7:811-818.
- (17) Oscroft NS, Ali M, Gulati A, Davies MG, Quinnell TG, Shneerson JM et al. A randomised crossover trial comparing volume assured and pressure preset noninvasive ventilation in stable hypercapnic COPD. *Copd: Journal of Chronic Obstructive Pulmonary Disease* 2010; 7(6):398-403.
